# Supplementary material for: Synthesis and characterization of fluorescent gold clusters encapsulated in PNIPAM and PAAM hydrogels for selective detection of mercury in water
Source: Royal Society of Chemistry journal article supplement (doi:10.1039/d3va00114h), 2023-01-01
Supplement: d3va00114h1.pdf [file d3va00114h1.pdf]

**Synthesis and characterization of fluorescent gold clusters encapsulated in PNIPAM and PAAM hydrogels for selective detection of mercury in water**

Gustavo A. Monti<sup>(1,2)\*</sup>; Gustavo A. Pino<sup>(3,4,5)</sup>; Acevedo, Diego<sup>(1,2)</sup>

*(1) Instituto de Investigaciones en Tecnologías Energéticas y Materiales Avanzados, IITEMA, (CONICET-UNRC) Universidad Nacional de Río Cuarto, Facultad de Ingeniería, Dpto. de Tecnología Química, 5800, Río Cuarto, Argentina.*

*(2) Instituto de Investigaciones en Tecnologías Energéticas y Materiales Avanzados, IITEMA, (CONICET-UNRC) Universidad Nacional de Río Cuarto, Facultad de Ciencias Exactas Físico-Químicas y Naturales, Dpto. de Química, 5800, Río Cuarto, Argentina.*

*(3) INFIQC : Instituto de Investigaciones en Fisicoquímica de Córdoba (CONICET – UNC) - Haya de la Torre y Medina Allende, Ciudad Universitaria, X5000HUA Córdoba, Argentina.*

*(4) Departamento de Fisicoquímica, Facultad de Ciencias Químicas – Universidad Nacional de Córdoba – Haya de la Torre y Medina Allende, Ciudad Universitaria, X5000HUA Córdoba, Argentina.*

*(5) Centro Láser de Ciencias Moleculares - Universidad Nacional de Córdoba - Haya de la Torre s/n, Pabellón Argentina, Ciudad Universitaria, X5000HUA Córdoba, Argentina.*

Corresponding-Authors: Dr. Gustavo. A. Monti. e-mail: [gmonti@exa.unrc.edu.ar](mailto:gmonti@exa.unrc.edu.ar)

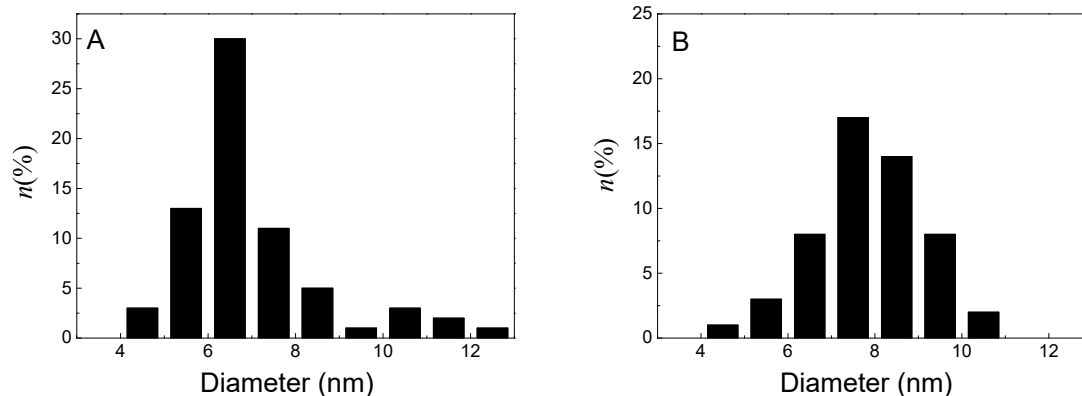

**Figure S1:** Histogram by number ( $n$ ) of the A) Au-PNIPAM NCs and B) Au-PAAM NCs.

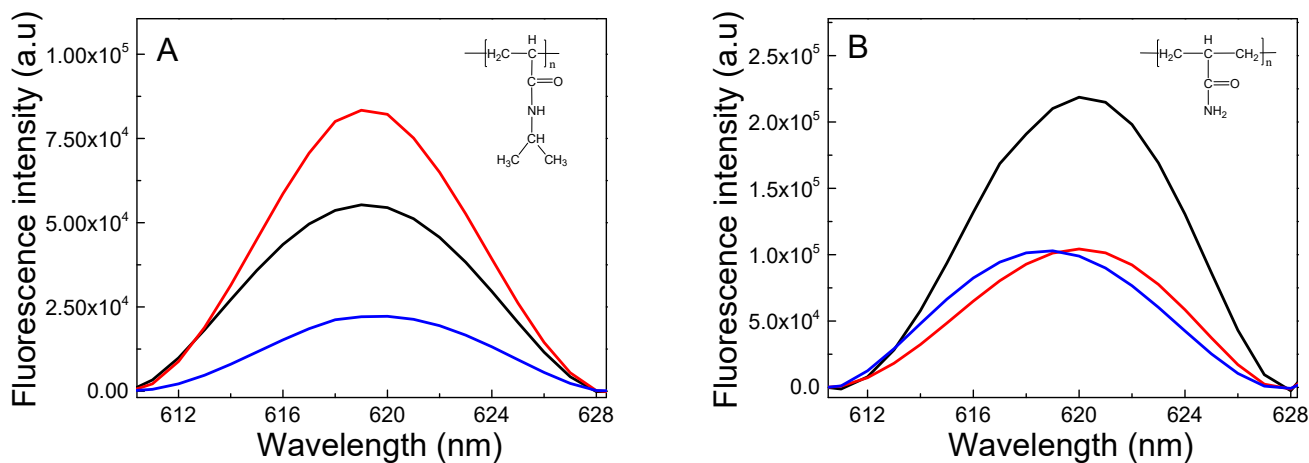

**Figure S2:** Effect of pH on the fluorescence of A) Au-PNIPAM NCs and B) Au-PAAM NCs. pH:4 (black line), pH:7 (red line) and pH:10 (blue line). Excitation wavelength: 535nm.

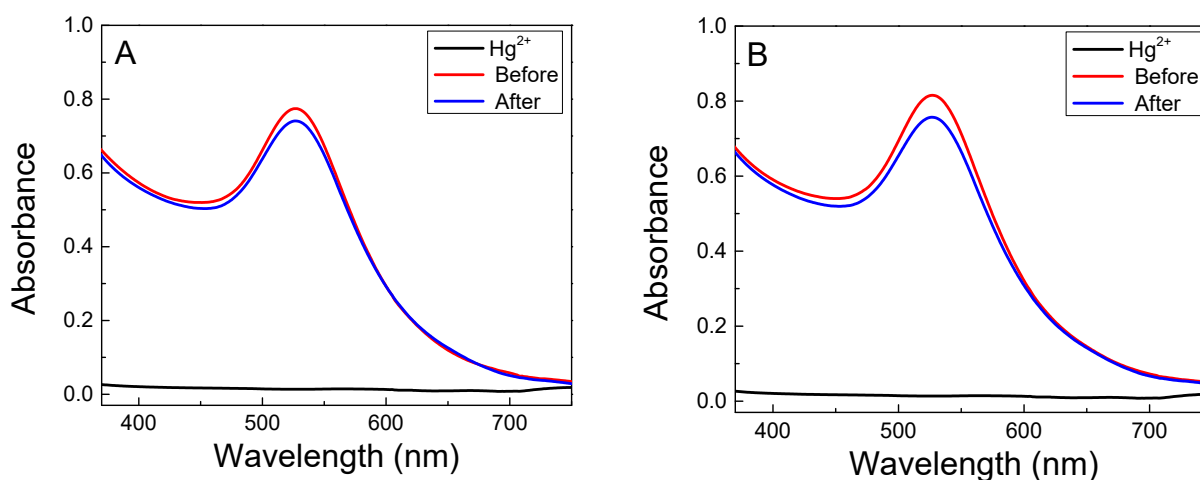

**Figure S3:** UV-Vis spectra of Hg<sup>2+</sup> ions (200nM) in water (black line), A) Au-PNIPAM NC and B) Au-PAAM before (red line) and after (blue line) Hg<sup>2+</sup> addition.

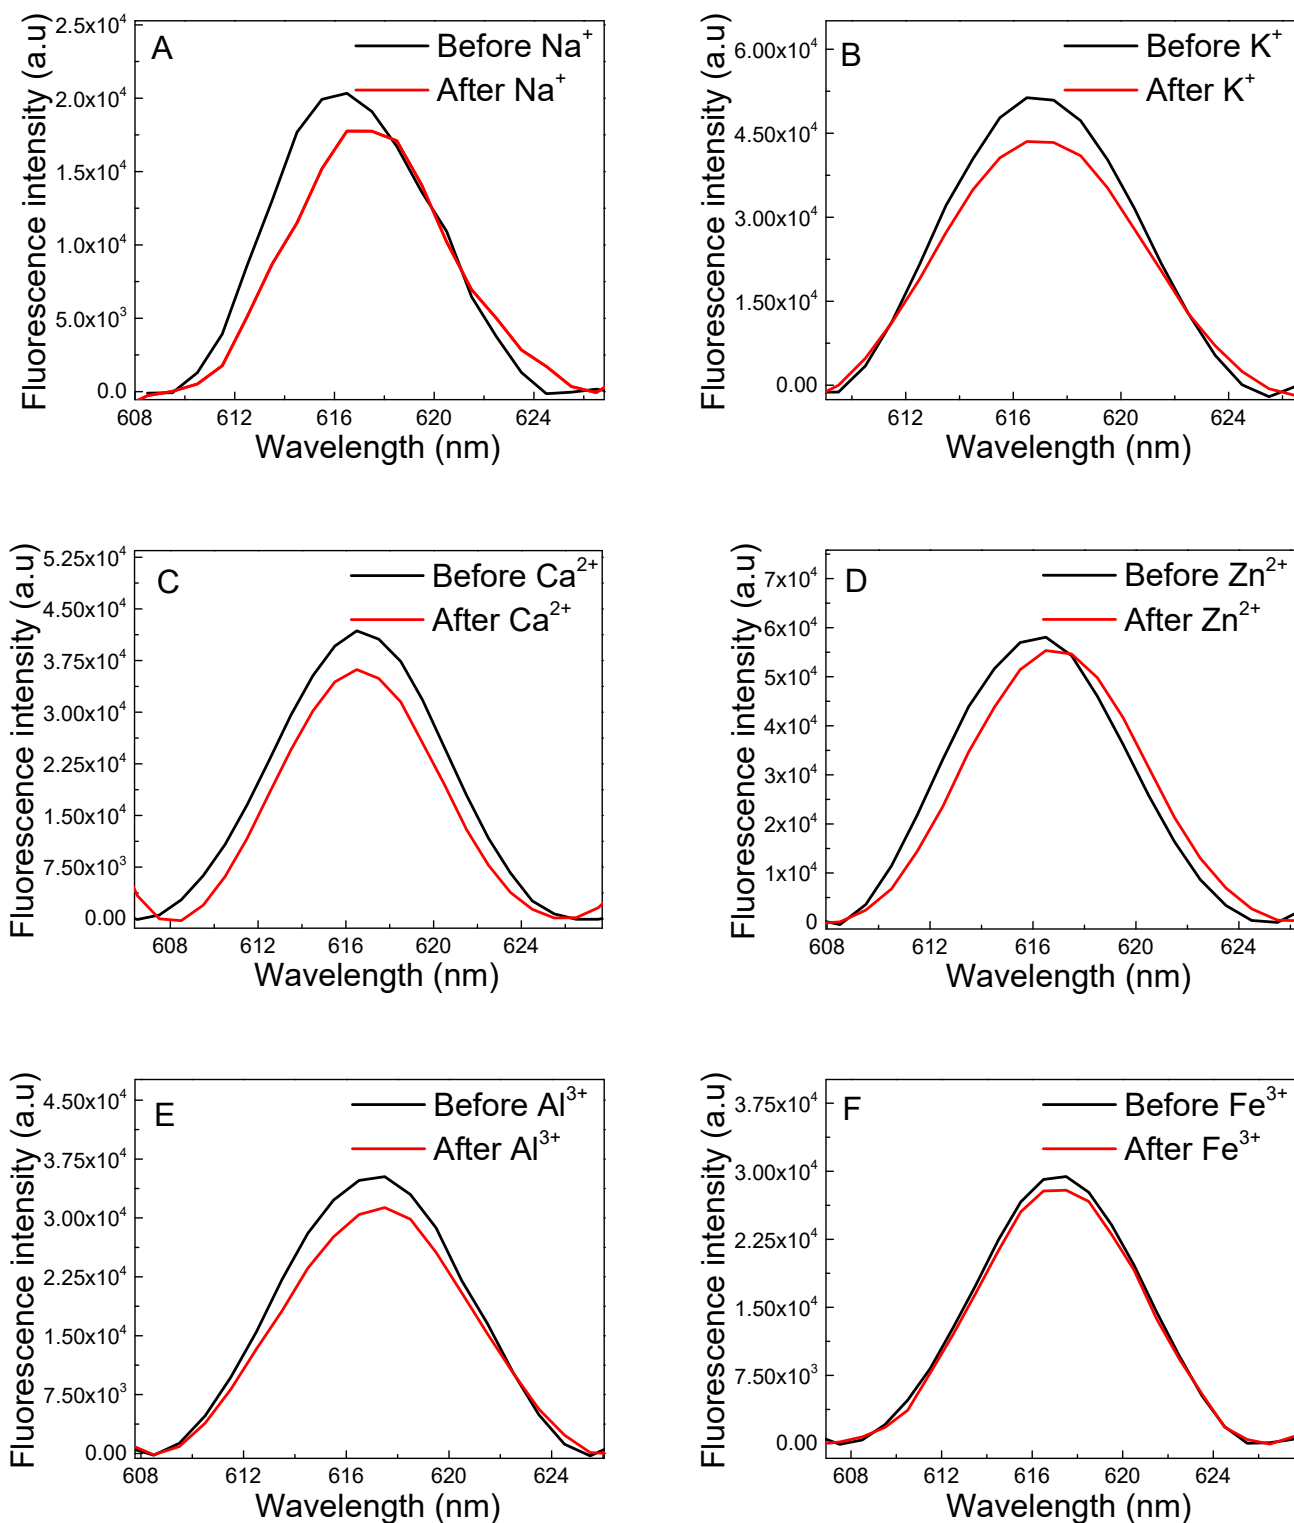

**Figure S4:** Fluorescence spectra of Au-PNIPAM NCs quenched by 20 nM of  $\text{Hg}^{2+}$  before (black) and after the addition of 20 nM of: A)  $\text{Na}^+$ , B)  $\text{K}^+$ , C)  $\text{Ca}^{2+}$ , D)  $\text{Zn}^{2+}$ , E)  $\text{Al}^{3+}$  and F)  $\text{Fe}^{3+}$ . Excitation wavelength: 535nm.

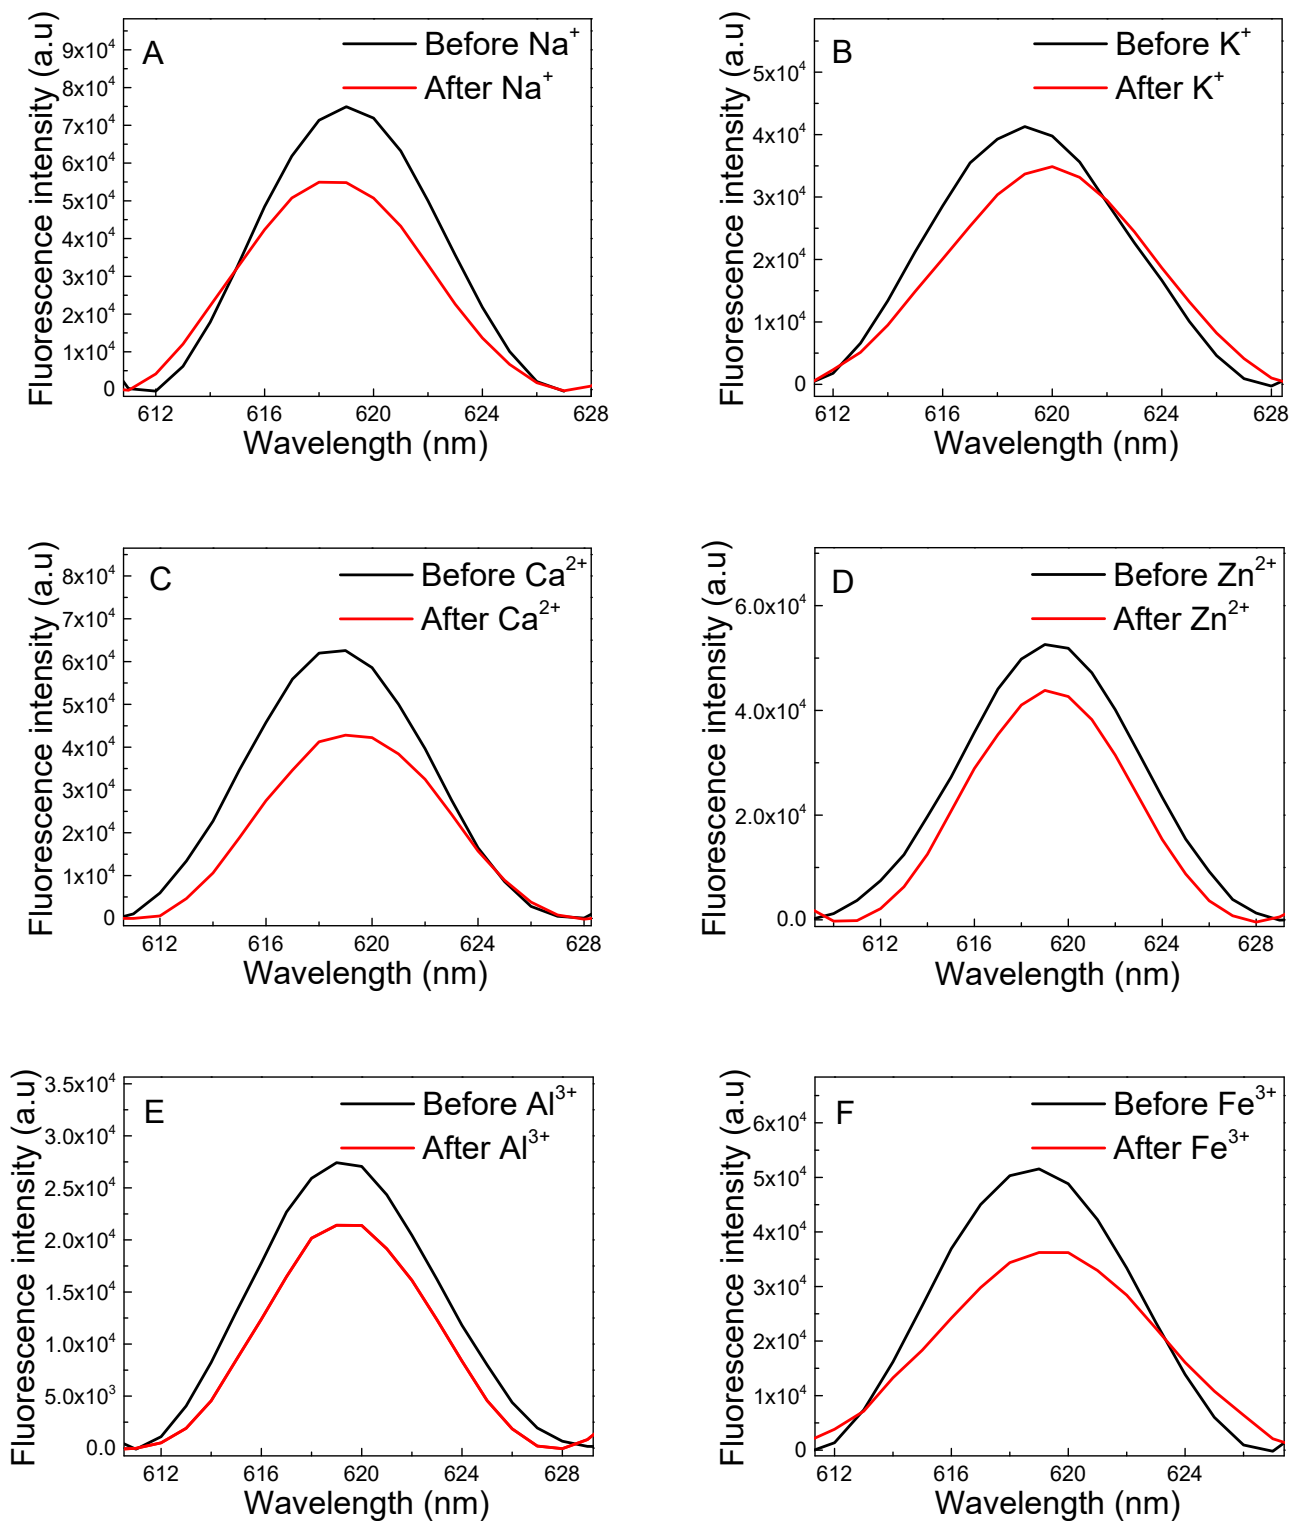

**Figure S5:** Fluorescence spectra of Au-PAAM NCs quenched by 20 nM of  $\text{Hg}^{2+}$  before (black) and after the addition of 20 nM of: A)  $\text{Na}^+$ , B)  $\text{K}^+$ , C)  $\text{Ca}^{2+}$ , D)  $\text{Zn}^{2+}$ , E)  $\text{Al}^{3+}$  and F)  $\text{Fe}^{3+}$ . Excitation wavelength: 535nm.
